# Supplementary material
Source: publisher site journal article supplement (https://zookeys.pensoft.net/article/4790/download/suppl/34/)
Supplement: Supplementary file 1

## Research Article
